# Supplementary material for: Gene Expression Profiling of Post Mortem Midbrain of Parkinson’s Disease Patients and Healthy Controls
Source: MDPI journal article supplement (doi:10.3390/ijms25020707), 2024-01-05
Supplement: s1 [file s1]

**Supplementary Table S4.** clinical features on the subjects included in the study.

| <b>Autopsy Id</b> | <b>Brain Bank</b>                              | <b>Age</b> | <b>Sex</b> | <b>Braak LB Stage</b>                                                             | <b>Braak Tangle</b>   | <b>Clinical Diagnoses</b>                                                                                                                        |
|-------------------|------------------------------------------------|------------|------------|-----------------------------------------------------------------------------------|-----------------------|--------------------------------------------------------------------------------------------------------------------------------------------------|
| PD1               | Multiple Sclerosis and Parkinson's Tissue Bank | 83         | M          | Parkinson's/Lewy body findings, Braak LB stage 6, Neocortical Lewy body disease   | Braak tangle stage II | Parkinson disease (Present) [+G20] ons:74.00 dur:10.00,                                                                                          |
| PD2               | Multiple Sclerosis and Parkinson's Tissue Bank | 79         | M          | Parkinson's/Lewy body findings, Braak LB stage 6, Neocortical Lewy body disease   | Braak tangle stage II | Parkinson disease (Present) [+G20], Multiple system atrophy, parkinsonian type [MSA-P] (Present) [+G23.2]                                        |
| PD3               | Multiple Sclerosis and Parkinson's Tissue Bank | 76         | F          | Parkinson's/Lewy body findings, Braak LB stage 6, Amygdala-only Lewy body disease | Braak tangle stage II | Parkinson disease (Present) [+G20] ons:53.00 dur:22.00                                                                                           |
| CRTL1             | Multiple Sclerosis and Parkinson's Tissue Bank | 84         | M          |                                                                                   |                       | No abnormality detected (Present) [+NAD] ons:0.00 dur:0.00                                                                                       |
| CRTL2             | Multiple Sclerosis and Parkinson's Tissue Bank | 84         | F          |                                                                                   |                       | No abnormality detected (Present) [+NAD] ons:0.00 dur:0.00                                                                                       |
| CRTL5             | Multiple Sclerosis and Parkinson's Tissue Bank | 74         | F          |                                                                                   |                       | Multiple sclerosis (Present) [+G35], No abnormality detected (Present) [+NAD]                                                                    |
| PD4               | Multiple Sclerosis and Parkinson's Tissue Bank | 89         | F          | Parkinson's/Lewy body findings, Braak LB stage 6, Limbic Lewy body disease        | Braak tangle stage II | Parkinson disease (Present) [+G20] ons:65.00 dur:24.00                                                                                           |
| PD5               | Multiple Sclerosis and Parkinson's Tissue Bank | 80         | M          | Parkinson's/Lewy body findings, Braak LB stage 6, Neocortical Lewy body disease   | Braak tangle stage II | Parkinson disease (Present) [+G20] ons:71.00 dur:8.00, Progressive supranuclear ophthalmoplegia [Steele-Richardson-Olszewski] (Present) [+G23.1] |
| CRTL6             | Multiple Sclerosis and Parkinson's Tissue Bank | 59         | F          |                                                                                   |                       | No abnormality detected (Present) [+NAD]                                                                                                         |
| PD6               | Multiple Sclerosis and Parkinson's Tissue Bank | 89         | M          | Parkinson's/Lewy body findings, Braak LB stage 6, Neocortical Lewy body disease   | Braak tangle stage II | Parkinson disease (Present) [+G20] ons:78.00 dur:11.00                                                                                           |
| PD7               | Multiple Sclerosis and Parkinson's Tissue Bank | 73         | M          | Parkinson's/Lewy body findings, Braak LB stage 6, Neocortical Lewy body disease   | Braak tangle stage II | Parkinson disease (Present) [+G20] ons:57.00 dur:17.00,                                                                                          |
| CRTL3             | Multiple Sclerosis and Parkinson's Tissue Bank | 87         | F          |                                                                                   |                       | No abnormality detected (Present) [+NAD] ons:0.00 dur:0.00                                                                                       |
| PD8               | Multiple Sclerosis and Parkinson's Tissue Bank | 80         | M          | Parkinson's/Lewy body findings, Braak LB stage 6, Neocortical Lewy body disease   | Braak tangle stage II | Parkinson disease (Present) [+G20] ons:56.00 dur:24.00                                                                                           |
| CRTL4             | Multiple Sclerosis and Parkinson's Tissue Bank | 81         | F          |                                                                                   |                       | No abnormality detected (Present) [+NAD] ons:0.00 dur:0.00                                                                                       |
