# Supplementary material for: Gene Expression Profiling of Post Mortem Midbrain of Parkinson’s Disease Patients and Healthy Controls
Source: Int J Mol Sci. 2024 Jan 5;25(2):707. doi: 10.3390/ijms25020707 (PMC10815072; doi:10.3390/ijms25020707)
Supplement: Supplementary file 1 [file ijms-25-00707-s001.zip]

Archive with 4 entries (4 files):
- Supplementari Table S4.pdf
- Supplementary Table S3.xls
- Supplementary_Table S1.xls
- Supplementary_Table S2.xls
