# Supplementary material for: Gene Expression Profiling of Post Mortem Midbrain of Parkinson’s Disease Patients and Healthy Controls
Source: Int J Mol Sci. 2024 Jan 5;25(2):707. doi: 10.3390/ijms25020707 (PMC10815072; doi:10.3390/ijms25020707)
Supplement: Supplementary file 1 [file ijms-25-00707-s001.zip › Supplementary Table S3.xls]

## Sheet: Sheet0
Supplementary Table 3: Diseases and Biological Functions
© 2000-2022 QIAGEN. All rights reserved.
Category	p-value	Molecules
Neurological Disease	5,69E-18-3,74E-03	AGT,AHCYL1,ALAD,AMPH,AQP1,ARHGDIB,ATP1B2,BCAS1,BSN,CNP,COLGALT1,CP,CST3,CTNNA3,DAAM2,DNAJC5,ELOVL7,EPAS1,ETNPPL,FADS2,FAM107A,FAT3,FYB1,GABARAPL1,GFAP,GNB5,GPR34,GUCY1B1,HEPACAM,HIPK2,HS6ST3,HSPH1,IL10RA,INA,L1CAM,MAP4,MAP4K4,MBP,MLC1,MOBP,MT-CO1,MT-CO2,MT-CO3,MT-CYB,NDRG2,NEAT1,NFIX,PAIP2B,PAQR6,PHLDB1,PKP4,PPP1R1B,PRDM11,PTPRT,RCSD1,RHOBTB3,SCARA3,SCN8A,SEPTIN4,SHTN1,SLC1A2,SLC38A2,SLC5A3,SLC8A…
Organismal Injury and Abnormalities	5,69E-18-3,74E-03	ACBD7,AGT,AHCYL1,ALAD,AMPH,AQP1,ARHGDIB,ATP1B2,BCAS1,BSN,CNP,COLGALT1,CP,CRCP,CST3,CTNNA3,DAAM2,DNAJC5,DYNLL1,ELOVL7,EPAS1,ETNPPL,FADS2,FAM107A,FAR1,FAT3,FYB1,GABARAPL1,GFAP,GNB5,GPR34,GUCY1B1,HEPACAM,HIPK2,HS6ST3,HSPH1,IL10RA,INA,IRAG1,L1CAM,MAP4,MAP4K4,MBP,MLC1,MOBP,MT-CO1,MT-CO2,MT-CO3,MT-CYB,MTURN,NAA30,NDRG2,NEAT1,NFIX,PADI2,PAIP2B,PAQR6,PHLDB1,PKP4,PLAAT3,PPDPF,PPP1R1B,PRDM11,PTPRT,QDPR,RCS…
Psychological Disorders	5,69E-18-3,74E-03	AGT,AHCYL1,AMPH,AQP1,ARHGDIB,BCAS1,CNP,COLGALT1,CP,CST3,CTNNA3,DAAM2,ELOVL7,ETNPPL,FADS2,FAM107A,GFAP,GNB5,GUCY1B1,HEPACAM,HSPH1,INA,L1CAM,MBP,MLC1,MOBP,MT-CO1,MT-CO2,MT-CO3,MT-CYB,NDRG2,NEAT1,PAQR6,PHLDB1,PPP1R1B,PTPRT,RHOBTB3,SCN8A,SEPTIN4,SLC1A2,SPARCL1,SPP1,TAGLN,TXNIP,VSNL1,WNK1
Skeletal and Muscular Disorders	9,67E-16-3,74E-03	AGT,AHCYL1,AQP1,ARHGDIB,ATP1B2,BCAS1,BSN,CNP,CP,CST3,CTNNA3,DAAM2,DYNLL1,ELOVL7,EPAS1,ETNPPL,FAM107A,GFAP,GNB5,GUCY1B1,IL10RA,IRAG1,L1CAM,MAP4,MAP4K4,MBP,MT-CO1,MT-CO2,MT-CO3,MT-CYB,NDRG2,NEAT1,PADI2,PAQR6,PHLDB1,PPP1R1B,RCSD1,RHOBTB3,SCN8A,SEPTIN4,SLC1A2,SLC5A3,SPARCL1,SPP1,SRGN,VSNL1,WNK1
Hereditary Disorder	8,3E-13-3,74E-03	AGT,AHCYL1,ALAD,AQP1,BSN,CNP,COLGALT1,CP,CST3,CTNNA3,DAAM2,DNAJC5,EPAS1,ETNPPL,FAM107A,FAT3,FYB1,GFAP,GNB5,GUCY1B1,HEPACAM,IL10RA,L1CAM,MAP4K4,MBP,MLC1,MT-CO1,MT-CO2,MT-CO3,MT-CYB,NDRG2,PHLDB1,PPP1R1B,QDPR,RHOBTB3,SCN8A,SEPTIN4,SLC1A2,SPP1,TAGLN,VSNL1,WNK1,YWHAG,ZEB2
Cancer	4,7E-08-3,74E-03	ACBD7,AGT,AHCYL1,ALAD,AMPH,AQP1,ARHGDIB,ATP1B2,BCAS1,BSN,CNP,COLGALT1,CP,CRCP,CST3,CTNNA3,DAAM2,DNAJC5,DYNLL1,ELOVL7,EPAS1,ETNPPL,FADS2,FAM107A,FAR1,FAT3,FYB1,GABARAPL1,GFAP,GNB5,GPR34,GUCY1B1,HEPACAM,HIPK2,HS6ST3,HSPH1,IL10RA,INA,IRAG1,L1CAM,MAP4,MAP4K4,MBP,MLC1,MOBP,MT-CO1,MT-CO2,MT-CO3,MT-CYB,MTURN,NAA30,NDRG2,NEAT1,NFIX,PADI2,PAIP2B,PAQR6,PHLDB1,PKP4,PPDPF,PPP1R1B,PRDM11,PTPRT,QDPR,RCSD1,RHOB…
Nervous System Development and Function	6,34E-08-3,74E-03	AGT,AMPH,ATP1B2,BCAS1,BSN,CNP,CP,CST3,DAAM2,DNAJC5,EPAS1,FAM107A,FAT3,GFAP,GPR34,HEPACAM,HIPK2,L1CAM,MAP4K4,MBP,MLC1,NDRG2,NFIX,PKP4,SCN8A,SEPTIN4,SHTN1,SLC1A2,SLC5A3,SPARCL1,SPP1,VSNL1,YWHAG,ZEB2
Tissue Morphology	6,34E-08-3,74E-03	AGT,AMPH,ATP1B2,BCAS1,CNP,COLGALT1,CP,CST3,DNAJC5,EPAS1,FADS2,FAT3,GFAP,GPR34,GUCY1B1,HEPACAM,HIPK2,L1CAM,MBP,MLC1,SHTN1,SLC1A2,SLC5A3,SPARCL1,SPP1
Developmental Disorder	6,71E-07-3,74E-03	AGT,ALAD,ARHGDIB,BCAS1,BSN,CNP,CP,CST3,DNAJC5,EPAS1,FAT3,FYB1,GFAP,GNB5,HEPACAM,HIPK2,L1CAM,MAP4K4,MBP,MLC1,MOBP,MT-CO1,MT-CO2,MT-CO3,MT-CYB,NFIX,QDPR,SCN8A,SLC1A2,SPP1,TAGLN,WNK1,YWHAG,ZEB2
Metabolic Disease	7,4E-07-3,74E-03	AGT,ALAD,AMPH,AQP1,CNP,CP,CST3,CTNNA3,DNAJC5,ELOVL7,EPAS1,FADS2,GFAP,GUCY1B1,IL10RA,L1CAM,MOBP,MT-CO1,MT-CO2,MT-CO3,MT-CYB,NDRG2,NEAT1,PLAAT3,QDPR,RHOBTB3,SCN8A,SLC1A2,SLC8A1,SPARCL1,SPP1,TAGLN,TXNIP,WNK1,ZEB2
Connective Tissue Disorders	7,73E-07-3,74E-03	ARHGDIB,CST3,CTNNA3,DYNLL1,EPAS1,GFAP,IL10RA,L1CAM,MAP4K4,MT-CO1,MT-CO2,PADI2,RCSD1,RHOBTB3,SCN8A,SLC1A2,SPP1,WNK1
Immunological Disease	7,73E-07-2,27E-03	AGT,AMPH,ARHGDIB,CST3,CTNNA3,DYNLL1,EPAS1,FADS2,FYB1,GFAP,IL10RA,L1CAM,MAP4K4,MT-CO1,MT-CO2,MT-CO3,MT-CYB,PADI2,RCSD1,RHOBTB3,SLC1A2,SPARCL1,SPP1,TAGLN,WNK1,ZEB2
Inflammatory Disease	7,73E-07-3,74E-03	AGT,ARHGDIB,BSN,CST3,CTNNA3,DYNLL1,EPAS1,FADS2,GFAP,GPR34,IL10RA,L1CAM,MAP4K4,MBP,MT-CO1,MT-CO2,MT-CO3,MT-CYB,PADI2,PTPRT,RCSD1,RHOBTB3,SCN8A,SLC1A2,SPARCL1,SPP1,WNK1,ZEB2
Inflammatory Response	7,73E-07-3,74E-03	AGT,AQP1,ARHGDIB,BCAS1,BSN,CST3,CTNNA3,DYNLL1,EPAS1,GFAP,GPR34,GUCY1B1,IL10RA,L1CAM,MAP4K4,MBP,MT-CO1,MT-CO2,MT-CYB,PADI2,PTPRT,RCSD1,RHOBTB3,SCN8A,SLC1A2,SLC8A1,SPP1,WNK1
Cell Morphology	7,95E-07-3,74E-03	AGT,AMPH,AQP1,ATP1B2,BCAS1,BSN,CNP,COLGALT1,CP,CST3,DAAM2,DNAJC5,DYNLL1,EPAS1,FADS2,FAM107A,FAT3,GFAP,GPR34,HEPACAM,HIPK2,L1CAM,MAP4,MAP4K4,MBP,MLC1,PADI2,PKP4,PPP1R1B,SEPTIN4,SHTN1,SLC1A2,SLC5A3,SPARCL1,SPP1,ZEB2
Cardiovascular Disease	1,03E-06-3,74E-03	AGT,AMPH,AQP1,ARHGDIB,CNP,COLGALT1,CST3,CTNNA3,DAAM2,EPAS1,FYB1,GFAP,GNB5,GUCY1B1,HSPH1,MAP4K4,MT-CO1,MT-CO2,MT-CO3,MT-CYB,NFIX,RCSD1,SEPTIN4,SHTN1,SLC1A2,SLC8A1,SPARCL1,SPP1,TAGLN,TXNIP,VSNL1,WNK1
Cellular Function and Maintenance	1,48E-06-3,74E-03	AGT,AQP1,ARHGDIB,ATP1B2,BSN,CNP,CP,DAAM2,DYNLL1,EPAS1,FAM107A,FAT3,FYB1,GABARAPL1,GFAP,HEPACAM,HIPK2,IL10RA,INA,L1CAM,MAP4,MAP4K4,MBP,MLC1,NDRG2,NEAT1,PHLDB1,PKP4,PLAAT3,PPP1R1B,RHOBTB3,SCN8A,SEPTIN4,SHTN1,SLC1A2,SLC5A3,SLC8A1,SPARCL1,SPP1,TP53INP2,TSC22D4,TXNIP,WNK1,YWHAG,ZEB2
Tissue Development	1,48E-06-3,74E-03	AGT,AMPH,ATP1B2,BSN,CNP,COLGALT1,CP,DAAM2,DNAJC5,DYNLL1,EPAS1,FADS2,FAM107A,FAT3,GFAP,GPR34,HEPACAM,HIPK2,IL10RA,INA,L1CAM,MAP4K4,MBP,MLC1,NDRG2,PAIP2B,PKP4,SEPTIN4,SHTN1,SLC8A1,SPARCL1,SPP1,WNK1,YWHAG,ZEB2
Molecular Transport	1,5E-06-3,74E-03	AGT,AHCYL1,AQP1,ATP1B2,CNP,CP,EPAS1,GFAP,GNB5,GUCY1B1,IRAG1,L1CAM,MAP4K4,MBP,MLC1,MT-CYB,NDRG2,PLAAT3,PPP1R1B,SCN8A,SLC1A2,SLC38A2,SLC5A3,SLC8A1,SPP1,TNPO1,TXNIP,VSNL1,WNK1
Cellular Movement	1,66E-06-3,74E-03	AGT,AQP1,ARHGDIB,CNP,CST3,DAAM2,EPAS1,FAM107A,FYB1,GFAP,GPR34,GUCY1B1,HIPK2,IL10RA,L1CAM,MAP4,MAP4K4,MBP,MLC1,NDRG2,NEAT1,PLAAT3,PPP1R1B,PTPRT,RHOBTB3,SCN8A,SEPTIN4,SLC1A2,SLC8A1,SPARCL1,SPP1,SRGN,TAGLN,TP53INP2,VSNL1,WNK1,YWHAG,ZEB2
Small Molecule Biochemistry	3,5E-06-3,74E-03	AGT,AHCYL1,AQP1,ATP1B2,CNP,CP,ELOVL7,EPAS1,FADS2,GNB5,GUCY1B1,MT-CO2,MT-CO3,NDRG2,PLAAT3,PPP1R1B,SCN8A,SLC1A2,SLC38A2,SLC5A3,SLC8A1,SPP1,TXNIP,WNK1
Carbohydrate Metabolism	6,34E-06-1,05E-03	AGT,AQP1,EPAS1,MAP4K4,PLAAT3,SLC1A2,SLC5A3,TXNIP
Cell Signaling	7,78E-06-4,74E-04	AGT,AHCYL1,AQP1,GNB5,GUCY1B1,IRAG1,SCN8A,SLC5A3,SPP1
Reproductive System Disease	9,47E-06-3,74E-03	ACBD7,AGT,AHCYL1,ALAD,AMPH,AQP1,ARHGDIB,BCAS1,BSN,CNP,COLGALT1,CP,CST3,CTNNA3,DAAM2,ELOVL7,EPAS1,ETNPPL,FADS2,FAM107A,FAT3,FYB1,GABARAPL1,GFAP,GNB5,GPR34,GUCY1B1,HEPACAM,HIPK2,HS6ST3,HSPH1,INA,IRAG1,L1CAM,MAP4,MAP4K4,MBP,MLC1,MT-CO1,MT-CO2,MT-CYB,MTURN,NDRG2,NEAT1,NFIX,PADI2,PHLDB1,PKP4,PPP1R1B,PRDM11,PTPRT,RCSD1,RHOBTB3,SCN8A,SEPTIN4,SHTN1,SLC1A2,SLC38A2,SLC5A3,SLC8A1,SPARCL1,SPP1,SRGN,TAGLN,TNP…
Cellular Assembly and Organization	1,2E-05-3,74E-03	AGT,AMPH,AQP1,ARHGDIB,ATP1B2,BSN,CNP,COLGALT1,CST3,CTNNA3,DAAM2,DNAJC5,DYNLL1,EPAS1,FAM107A,FAT3,FYB1,GFAP,HIPK2,IL10RA,INA,L1CAM,MAP4,MAP4K4,MBP,NEAT1,PHLDB1,PKP4,PLAAT3,PPP1R1B,SEPTIN4,SHTN1,SPARCL1,SPP1,TAGLN,YWHAG,ZEB2
Endocrine System Disorders	2,14E-05-2,52E-03	ACBD7,AGT,AHCYL1,ALAD,AMPH,AQP1,ARHGDIB,ATP1B2,BCAS1,BSN,CNP,COLGALT1,CP,CRCP,CTNNA3,DAAM2,DNAJC5,ELOVL7,EPAS1,ETNPPL,FADS2,FAR1,FAT3,FYB1,GFAP,GPR34,GUCY1B1,HEPACAM,HIPK2,HS6ST3,HSPH1,IL10RA,INA,L1CAM,MAP4,MAP4K4,MBP,MLC1,MOBP,MT-CO1,MT-CO2,MT-CO3,MT-CYB,NAA30,NDRG2,NFIX,PADI2,PAQR6,PHLDB1,PKP4,PLAAT3,PPDPF,PRDM11,PTPRT,QDPR,RCSD1,RHOBTB3,SCARA3,SCN8A,SHTN1,SLC1A2,SLC38A2,SLC8A1,SPP1,SRGN,TAGLN,…
Gastrointestinal Disease	2,14E-05-3,74E-03	AGT,AHCYL1,ALAD,AMPH,AQP1,ATP1B2,BCAS1,BSN,CNP,COLGALT1,CP,CST3,CTNNA3,DAAM2,DNAJC5,DYNLL1,ELOVL7,EPAS1,ETNPPL,FADS2,FAM107A,FAR1,FAT3,FYB1,GABARAPL1,GFAP,GNB5,GUCY1B1,HEPACAM,HIPK2,HS6ST3,HSPH1,IL10RA,INA,IRAG1,L1CAM,MAP4,MAP4K4,MBP,MLC1,MOBP,MT-CO1,MT-CO2,MT-CYB,MTURN,NDRG2,NEAT1,NFIX,PADI2,PAQR6,PHLDB1,PKP4,PLAAT3,PPDPF,PPP1R1B,PRDM11,PTPRT,QDPR,RCSD1,RHOBTB3,SCARA3,SCN8A,SEPTIN4,SHTN1,SLC1A2,…
Organismal Survival	2,5E-05-1,65E-03	AGT,AMPH,AQP1,ARHGDIB,ATP1B2,CNP,COLGALT1,CST3,CTNNA3,DNAJC5,EPAS1,FADS2,GFAP,GNB5,GUCY1B1,HIPK2,IL10RA,IRAG1,L1CAM,MAP4,MAP4K4,MT-CO1,MT-CYB,NDRG2,NEAT1,NFIX,PPP1R1B,QDPR,RHOBTB3,SCN8A,SLC1A2,SLC5A3,SLC8A1,SPP1,SRGN,TXNIP,ZEB2
Ophthalmic Disease	3,31E-05-3,74E-03	ATP1B2,CNP,CP,CST3,DNAJC5,EPAS1,FAT3,GPR34,MT-CO1,MT-CO2,MT-CO3,MT-CYB
Organ Morphology	4E-05-3,74E-03	AGT,ATP1B2,CP,CST3,CTNNA3,DNAJC5,FAT3,GFAP,GPR34,L1CAM,MLC1,NFIX,SLC1A2,SLC8A1,SPARCL1,SPP1,TXNIP
Organismal Development	4E-05-3,74E-03	AGT,AMPH,AQP1,ARHGDIB,ATP1B2,BSN,CNP,COLGALT1,CP,CST3,DAAM2,DNAJC5,EPAS1,FADS2,FAM107A,FAT3,GFAP,GNB5,GPR34,GUCY1B1,HIPK2,L1CAM,MAP4K4,MBP,MLC1,NFIX,PAIP2B,PKP4,PLAAT3,RHOBTB3,SEPTIN4,SHTN1,SLC1A2,SLC5A3,SLC8A1,SPARCL1,SPP1,WNK1,YWHAG,ZEB2
Hematological System Development and Function	4,14E-05-3,74E-03	AGT,CST3,EPAS1,GUCY1B1,HIPK2,IRAG1,MBP,MT-CO1,MT-CYB,SLC8A1,SPP1,WNK1
Infectious Diseases	4,14E-05-3,74E-03	AHCYL1,AMPH,ARHGDIB,CST3,EPAS1,GABARAPL1,GFAP,IL10RA,MAP4K4,MT-CO1,MT-CO2,SLC1A2,SPP1,TXNIP,ZEB2
Lymphoid Tissue Structure and Development	4,14E-05-4,14E-05	AGT,MBP
Renal and Urological Disease	4,14E-05-3,74E-03	AGT,ALAD,AQP1,COLGALT1,CP,CST3,DAAM2,EPAS1,FAT3,FYB1,GUCY1B1,HEPACAM,IL10RA,L1CAM,MAP4,MBP,MLC1,MOBP,MT-CO1,MT-CO2,MT-CO3,MT-CYB,NDRG2,PADI2,PKP4,PLAAT3,PPP1R1B,PRDM11,PTPRT,SCN8A,SLC5A3,SLC8A1,SPARCL1,SPP1,TAGLN,TSC22D4,TXNIP,WNK1,ZEB2
Cellular Development	6,44E-05-3,74E-03	AGT,AMPH,ATP1B2,BSN,CNP,FADS2,FAM107A,FAT3,GFAP,HIPK2,L1CAM,MAP4K4,MBP,NDRG2,PAIP2B,PKP4,SEPTIN4,SHTN1,SLC8A1,SPARCL1,SPP1,WNK1,YWHAG,ZEB2
Cellular Growth and Proliferation	6,44E-05-3,74E-03	AGT,AMPH,ATP1B2,BSN,CNP,FADS2,FAM107A,FAT3,GFAP,HIPK2,L1CAM,MAP4K4,MBP,NDRG2,PAIP2B,PKP4,SEPTIN4,SHTN1,SLC8A1,SPARCL1,SPP1,WNK1,YWHAG,ZEB2
Cell-To-Cell Signaling and Interaction	7,35E-05-3,74E-03	AGT,AMPH,BSN,CNP,CST3,CTNNA3,DNAJC5,EPAS1,FAM107A,FYB1,GFAP,HIPK2,IL10RA,L1CAM,MAP4K4,MBP,MLC1,MT-CO1,MT-CYB,NDRG2,PKP4,SCN8A,SLC1A2,SLC38A2,SPARCL1,SPP1,SRGN,TSC22D4,VSNL1,YWHAG,ZEB2
Cellular Compromise	7,35E-05-3,74E-03	AGT,EPAS1,HIPK2,MLC1,NDRG2,SLC38A2,TSC22D4,TXNIP
Hepatic System Disease	8,97E-05-3,74E-03	AGT,ALAD,AMPH,AQP1,BSN,COLGALT1,CP,CST3,CTNNA3,DAAM2,DYNLL1,FADS2,FAT3,FYB1,GNB5,GUCY1B1,HEPACAM,HIPK2,HS6ST3,HSPH1,L1CAM,MAP4,MAP4K4,MBP,MOBP,MT-CO1,MT-CYB,NDRG2,NEAT1,NFIX,PADI2,PHLDB1,PKP4,PLAAT3,PPP1R1B,PTPRT,RCSD1,RHOBTB3,SCN8A,SHTN1,SLC38A2,SLC5A3,SPARCL1,SPP1,TNPO1,TXNIP,WNK1,YWHAG,ZEB2,ZNF618
Skeletal and Muscular System Development and Function	1E-04-3,74E-03	AGT,AQP1,CNP,CTNNA3,DNAJC5,IRAG1,SLC8A1,SPP1,TXNIP
Cell Death and Survival	3,82E-04-3,74E-03	AGT,CNP,CST3,DNAJC5,DYNLL1,EPAS1,GFAP,GNB5,GPR34,HIPK2,HSPH1,L1CAM,MAP4,MAP4K4,MBP,NAA30,NDRG2,NFIX,PLAAT3,PPP1R1B,PTPRT,SEPTIN4,SLC1A2,SLC8A1,SPP1,SRGN,TXNIP,VSNL1,WNK1,YWHAG,ZEB2
Amino Acid Metabolism	3,98E-04-3,74E-03	AGT,CP,NDRG2,SLC1A2,SLC38A2
Cardiovascular System Development and Function	4,2E-04-3,74E-03	AGT,AQP1,COLGALT1,CST3,CTNNA3,EPAS1,GFAP,GNB5,GUCY1B1,HIPK2,IRAG1,L1CAM,SCN8A,SLC8A1,SPP1,TXNIP,WNK1,YWHAG
Organ Development	4,2E-04-3,74E-03	AGT,AMPH,AQP1,ATP1B2,COLGALT1,CP,CTNNA3,DAAM2,DNAJC5,EPAS1,FADS2,FAT3,GFAP,GNB5,GPR34,IRAG1,PAIP2B,SCN8A,SEPTIN4,SLC8A1,SPP1,TXNIP
Vitamin and Mineral Metabolism	4,74E-04-4,74E-04	AGT,AHCYL1,GNB5,SCN8A,SLC5A3,SPP1
Respiratory Disease	4,9E-04-1,87E-03	EPAS1,L1CAM,MAP4,MT-CO1,MT-CO2,MT-CYB,SPP1,ZEB2
Nucleic Acid Metabolism	6,95E-04-6,95E-04	AGT,GUCY1B1,MT-CO2,MT-CO3,SLC1A2,TXNIP
Immune Cell Trafficking	7,45E-04-9,21E-04	CST3,MT-CO1,MT-CYB,SPP1
Lipid Metabolism	7,45E-04-3,74E-03	AGT,ELOVL7,FADS2,PLAAT3
Behavior	8,25E-04-8,25E-04	AGT,CNP,CP,DNAJC5,HIPK2,PPP1R1B,SCN8A,SPP1
Digestive System Development and Function	8,91E-04-1,75E-03	AGT,COLGALT1,CP,FADS2,GUCY1B1,HIPK2,IRAG1,MAP4K4,NFIX,PLAAT3,SPP1,TXNIP
Free Radical Scavenging	1,1E-03-1,1E-03	AGT,ARHGDIB,CST3,EPAS1,MT-CO2,SLC5A3,SLC8A1,SPP1,TAGLN,TXNIP
Connective Tissue Development and Function	1,22E-03-3,74E-03	AGT,HIPK2,SPP1
Hematological Disease	1,55E-03-3,74E-03	AGT,ALAD,AMPH,AQP1,BSN,CNP,CP,CST3,DNAJC5,EPAS1,FAT3,FYB1,GFAP,GUCY1B1,HS6ST3,HSPH1,INA,L1CAM,MAP4K4,MT-CO1,MT-CO2,MT-CO3,MT-CYB,NDRG2,NFIX,PAQR6,PKP4,PPP1R1B,PTPRT,RHOBTB3,SCN8A,SEPTIN4,SLC1A2,SLC8A1,SPARCL1,SPP1,WNK1,ZEB2
Hepatic System Development and Function	1,75E-03-1,75E-03	COLGALT1,CP,FADS2,GUCY1B1,PLAAT3,SPP1
Hematopoiesis	1,81E-03-3,74E-03	EPAS1,SEPTIN4,ZEB2
Protein Trafficking	1,83E-03-1,83E-03	AGT,AHCYL1,GFAP,MBP,MLC1,TNPO1,TXNIP
Embryonic Development	2,24E-03-3,74E-03	AGT,AMPH,ATP1B2,COLGALT1,CP,DAAM2,DNAJC5,EPAS1,FADS2,FAT3,GPR34,PAIP2B,SEPTIN4,SLC8A1
Visual System Development and Function	2,24E-03-2,24E-03	ATP1B2,CP,DNAJC5,FAT3,GPR34
Reproductive System Development and Function	2,33E-03-3,74E-03	AGT,AMPH,COLGALT1,DAAM2,EPAS1,FADS2,PAIP2B,SEPTIN4,SLC8A1
Renal and Urological System Development and Function	3,04E-03-3,74E-03	AGT,SPP1,TXNIP
Nutritional Disease	3,13E-03-3,13E-03	AGT,EPAS1,GNB5,HIPK2,L1CAM,NFIX,PLAAT3
Cell Cycle	3,62E-03-3,74E-03	AGT,PPP1R1B,TXNIP,ZEB2
Gene Expression	3,62E-03-3,62E-03	AGT,PPP1R1B
Antigen Presentation	3,74E-03-3,74E-03	CST3
Drug Metabolism	3,74E-03-3,74E-03	PPP1R1B
Energy Production	3,74E-03-3,74E-03	CP
Hypersensitivity Response	3,74E-03-3,74E-03	ZEB2
Organismal Functions	3,74E-03-3,74E-03	AGT
Post-Translational Modification	3,74E-03-3,74E-03	CP,NAA30
