# Supplementary material for: Gene Expression Profiling of Post Mortem Midbrain of Parkinson’s Disease Patients and Healthy Controls
Source: Int J Mol Sci. 2024 Jan 5;25(2):707. doi: 10.3390/ijms25020707 (PMC10815072; doi:10.3390/ijms25020707)
Supplement: Supplementary file 1 [file ijms-25-00707-s001.zip › Supplementary_Table S1.xls]

## Sheet: KEGG
	Supplementari Table 1: KEGG) pathway database, and enrichment analysis
ID	Term_Description	Fold_Enrichment	occurrence	support	lowest_p	highest_p	Up_regulated	Down_regulated
hsa04140	Autophagy - animal	3.76538	10	0.0119778	0.000322379	0.000322379	GABARAPL1	TP53INP2
hsa04141	Protein processing in endoplasmic reticulum	3.25403	5	0.00591716	0.00124482	0.00686036	DNAJC5, HSPH1
hsa04614	Renin-angiotensin system	11.9807	10	0.0117311	0.00187001	0.00466946		AGT
hsa04964	Proximal tubule bicarbonate reclamation	22.9197	10	0.00647419	0.00204798	0.00511357		AQP1, ATP1B2
hsa03020	RNA polymerase	8.50247	4	0.00612314	0.00376229	0.00376229	CRCP
hsa04136	Autophagy - other	8.23676	8	0.00619486	0.00401287	0.00401287	GABARAPL1
hsa04960	Aldosterone-regulated sodium reabsorption	7.53076	10	0.00647419	0.00481297	0.0120088		ATP1B2
hsa01040	Biosynthesis of unsaturated fatty acids	22.9197	10	0.00647419	0.00511357	0.0153024		ELOVL7, FADS2
hsa04973	Carbohydrate digestion and absorption	5.85725	10	0.00647419	0.00800336	0.0199572		ATP1B2
hsa04961	Endocrine and other factor-regulated calcium reabsorption	9.94628	10	0.00647419	0.0111347	0.0277524	SLC8A1	ATP1B2
hsa04978	Mineral absorption	8.78588	10	0.00647419	0.0142962	0.0356174	SLC8A1	ATP1B2
hsa04962	Vasopressin-regulated water reabsorption	11.9807	10	0.00634927	0.0190725	0.0190725	ARHGDIB, DYNLL1
hsa04137	Mitophagy - animal	3.71234	10	0.0122463	0.0200581	0.0200581	GABARAPL1
hsa04918	Thyroid hormone synthesis	3.66078	1	0.00512821	0.02063	0.02063		ATP1B2
hsa04971	Gastric acid secretion	3.46811	1	0.00512821	0.0229974	0.0229974		ATP1B2
hsa05211	Renal cell carcinoma	4.05502	9	0.00632911	0.0279394	0.0418305		EPAS1
hsa04260	Cardiac muscle contraction	9.3027	9	0.00636943	0.0287919	0.047868	SLC8A1	COX2, ATP1B2
hsa04911	Insulin secretion	3.1009	1	0.00512821	0.0287919	0.0287919		ATP1B2
hsa04727	GABAergic synapse	9.19453	8	0.00619486	0.0294756	0.0294756	SLC38A2, GABARAPL1, GNB5
hsa04976	Bile secretion	6.12969	1	0.00512821	0.0294756	0.0294756		ATP1B2, AQP1
hsa04970	Salivary secretion	5.85725	1	0.00512821	0.0322905	0.0322905		ATP1B2, CST3
hsa05213	Endometrial cancer	4.54442	10	0.00844258	0.033271	0.0465018		CTNNA3
hsa04621	NOD-like receptor signaling pathway	2.99519	8	0.00619486	0.0337389	0.0337389	GABARAPL1	TXNIP
hsa04666	Fc gamma R-mediated phagocytosis	2.80401	1	0.00512821	0.035233	0.035233	AMPH
hsa04925	Aldosterone synthesis and secretion	5.37911	1	0.00512821	0.038303	0.038303		AGT, ATP1B2
hsa04974	Protein digestion and absorption	7.98717	1	0.00512821	0.0390904	0.0390904	SLC38A2, SLC8A1	ATP1B2
hsa04972	Pancreatic secretion	2.63576	1	0.00512821	0.0398858	0.0398858		ATP1B2
hsa04520	Adherens junction	3.99358	7	0.00632911	0.0431326	0.0431326		CTNNA3
hsa05034	Alcoholism	4.97314	8	0.00619486	0.0448252	0.0448252	GNB5	PPP1R1B
hsa05100	Bacterial invasion of epithelial cells	3.81995	5	0.00606061	0.0471575	0.0471575		CTNNA3
