# Supplementary material for: Gene Expression Profiling of Post Mortem Midbrain of Parkinson’s Disease Patients and Healthy Controls
Source: Int J Mol Sci. 2024 Jan 5;25(2):707. doi: 10.3390/ijms25020707 (PMC10815072; doi:10.3390/ijms25020707)
Supplement: Supplementary file 1 [file ijms-25-00707-s001.zip › Supplementary_Table S2.xls]

## Sheet: GOALL
	Supplementary Table 2: GO pathway database, and enrichment analysis;
ID	Term_Description	Fold_Enrichment	occurrence	support	lowest_p	highest_p	Up_regulated	Down_regulated
GO:0007268	chemical synaptic transmission	12.795	9	0.0126582	2.17039e-05	0.00010057	AMPH, BSN	CNP, MBP, SLC1A2
GO:0071456	cellular response to hypoxia	10.9824	10	0.0123897	0.00109575	0.00218644		AQP1, EPAS1, HIPK2
GO:2000434	regulation of protein neddylation	43.9294	1	0.00657895	0.00206674	0.00206674		EPAS1
GO:0030578	PML body organization	43.9294	10	0.00634927	0.00206674	0.00309973		HIPK2
GO:0030007	cellular potassium ion homeostasis	29.2863	10	0.00647419	0.00297592	0.00743671		ATP1B2
GO:0036376	sodium ion export across plasma membrane	29.2863	10	0.00647419	0.00297592	0.00743671		ATP1B2
GO:1903598	positive regulation of gap junction assembly	43.9294	9	0.00636943	0.00309973	0.00309973		AGT
GO:0086073	bundle of His cell-Purkinje myocyte adhesion involved in cell communication	43.9294	4	0.00621502	0.00309973	0.00309973		CTNNA3
GO:0086064	cell communication by electrical coupling involved in cardiac conduction	47.923	10	0.00647419	0.00454601	0.0113589	SLC8A1	ATP1B2
GO:0072584	caveolin-mediated endocytosis	52.7153	1	0.00606061	0.00619799	0.00619799		MLC1
GO:0006883	cellular sodium ion homeostasis	37.6538	10	0.00647419	0.00752023	0.0187872	SLC8A1	ATP1B2
GO:0034115	negative regulation of heterotypic cell-cell adhesion	47.923	9	0.0121212	0.00757465	0.021192		MBP, WNK1
GO:0086009	membrane repolarization	23.9615	10	0.00634927	0.0113589	0.0113589		ATP1B2
GO:0098911	regulation of ventricular cardiac muscle cell action potential	23.9615	4	0.00621502	0.0113589	0.0113589		CTNNA3
GO:2000059	negative regulation of ubiquitin-dependent protein catabolic process	18.8269	10	0.00634927	0.0125292	0.0187872		HIPK2
GO:1990573	potassium ion import across plasma membrane	13.1788	10	0.00647419	0.015696	0.0391979		ATP1B2
GO:0046697	decidualization	23.9615	10	0.00634927	0.0158982	0.0272395	SPP1
GO:0006978	DNA damage response, signal transduction by p53 class mediator resulting in transcription of p21 class mediator	29.2863	2	0.00669633	0.0178369	0.0222915		HIPK2
GO:0042771	intrinsic apoptotic signaling pathway in response to DNA damage by p53 class mediator	14.6431	10	0.0123897	0.0210581	0.0315722		HIPK2
GO:0030511	positive regulation of transforming growth factor beta receptor signaling pathway	20.2751	2	0.00559441	0.0268388	0.0446994		ZEB2, HIPK2
GO:1903779	regulation of cardiac conduction	27.7449	9	0.00636943	0.0352823	0.0352823	SLC8A1	AGT
GO:0006986	response to unfolded protein	10.9824	4	0.00586556	0.0379669	0.0379669	HSPH1
GO:0000045	autophagosome assembly	7.98717	10	0.00634927	0.0435845	0.0435845		TP53INP2
